# Supplementary material for: Hydrophilic hindering and hydrophobic growing: a vesicle glycometabolism multi-drug combination therapeutic against Alzheimer's disease
Source: Royal Society of Chemistry journal article supplement (doi:10.1039/d1bm00696g), 2021-01-01
Supplement: d1bm00696g1.pdf [file d1bm00696g1.pdf]

## Supporting information

**Table S1** The particle size, particle size distribution and drug loading content of vesicle

| Vesicle                | Size (nm) <sup>a</sup> | PDI <sup>a</sup> | DLC (wt%) <sup>b</sup> |
|------------------------|------------------------|------------------|------------------------|
| Vesicle <sub>MEM</sub> | 203 ± 3                | 0.18 ± 0.02      | 19.4 ± 0.2             |
| Vesicle <sub>DON</sub> | 202 ± 2                | 0.18 ± 0.02      | 19.5 ± 0.2             |
| Vesicle <sub>INS</sub> | 204 ± 2                | 0.16 ± 0.03      | 19.3 ± 0.3             |
| Vesicle <sub>REP</sub> | 203 ± 3                | 0.17 ± 0.01      | 19.2 ± 0.3             |
| Vesicle <sub>MET</sub> | 201 ± 3                | 0.16 ± 0.03      | 19.3 ± 0.1             |

a: Determined by DLS, b: Determined by UV

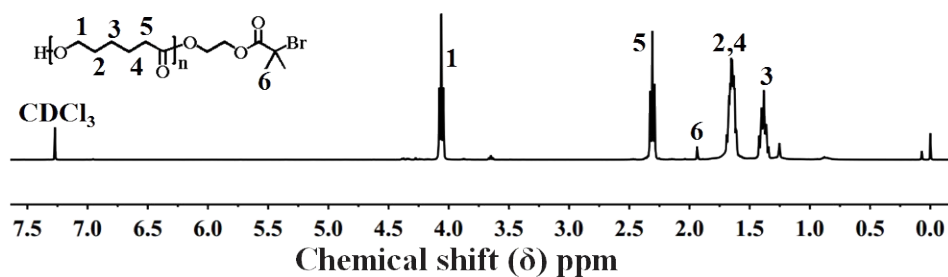

Fig. S1. <sup>1</sup>H-NMR spectrum of PCL<sub>60</sub>-HEBIB.

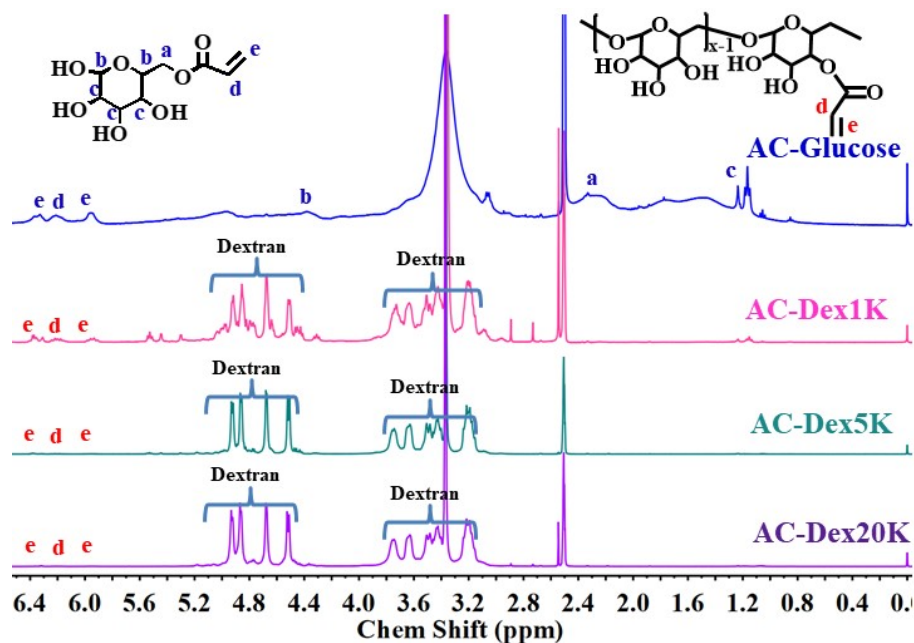

Fig. S2 <sup>1</sup>H-NMR spectrum of AC-Glucose, AC-Dex1K, AC-Dex5K, AC-Dex20K.

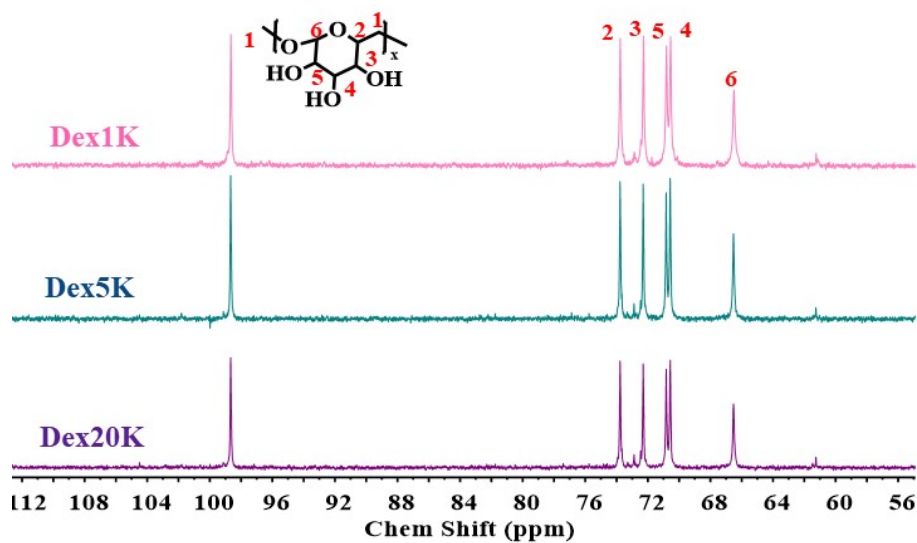

Fig. S3. <sup>13</sup>C-NMR spectrum of Dex1K, Dex5K and Dex20K.

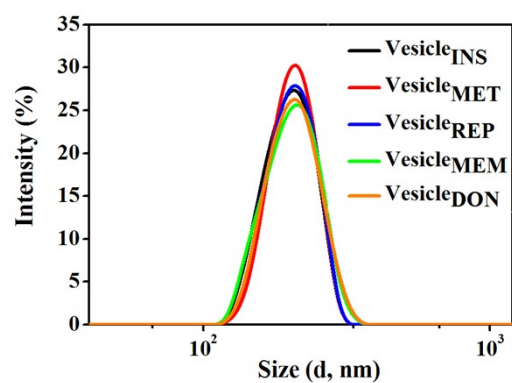

Fig. S4. The hydrodynamic diameter of drug-loaded vesicle.

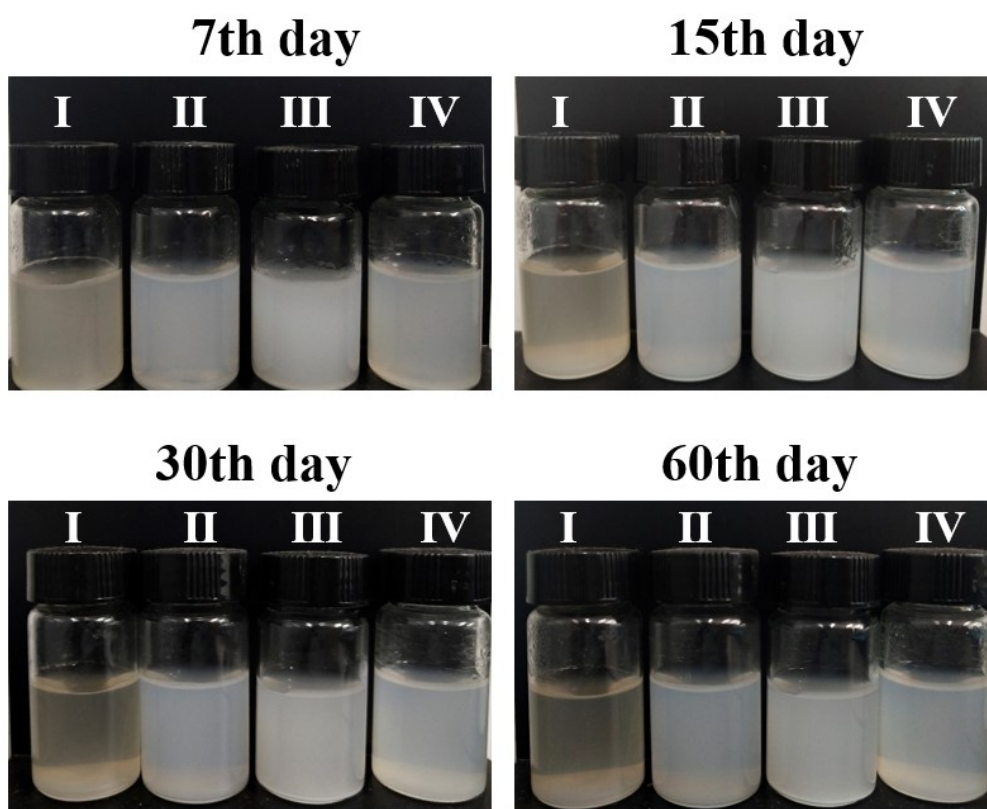

Fig. S5 Nanoparticles stability test. (I: PCL-g-PGlu<sub>120</sub>, II: PCL-g-Dex1K<sub>20</sub>, III: PCL-g-Dex5K<sub>4</sub>, IV: PCL-g-Dex20K).

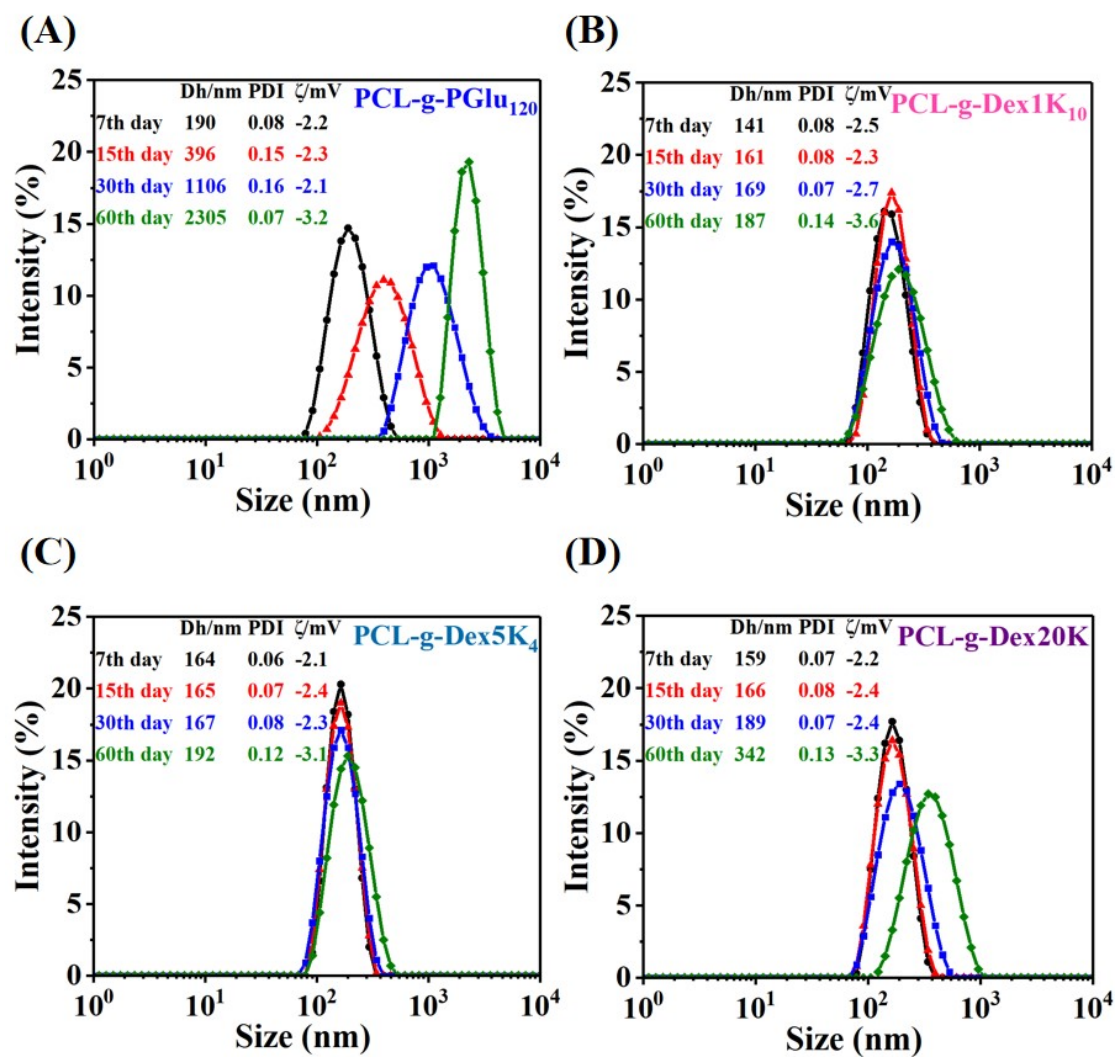

**Fig. S6** Nanoparticles stability test. Changes in hydrodynamic diameter and zeta potential (by DLS) of (A: PCL-g-PGlu<sub>120</sub>, B: PCL-g-Dex1K<sub>20</sub>, C: PCL-g-Dex5K<sub>4</sub>, D: PCL-g-Dex20K) over time.

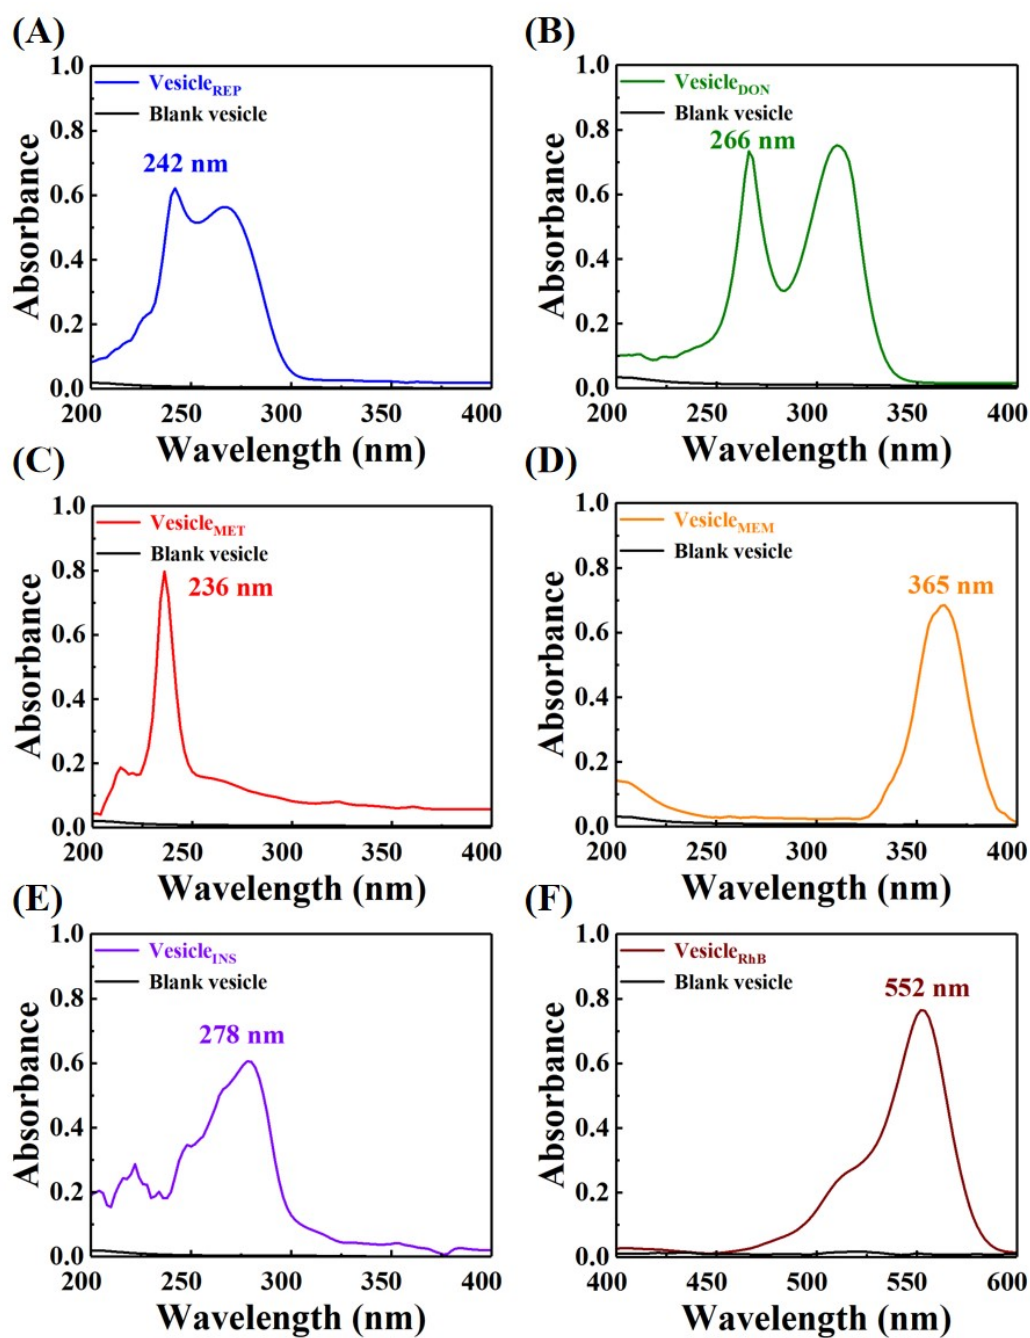

**Fig. S7** The UV absorption curve of vesicles before and after loading drug. A) Vesicle<sub>REP</sub>, B) Vesicle<sub>DON</sub>, C) Vesicle<sub>MET</sub>, D) Vesicle<sub>MEM</sub>, E) Vesicle<sub>INS</sub>, F) Vesicle<sub>RhB</sub>.

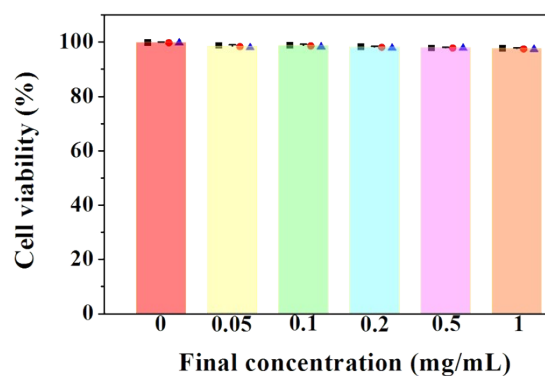

**Fig. S8** Biocompatibility of vesicle. The mean  $\pm$  SD is shown versus control.

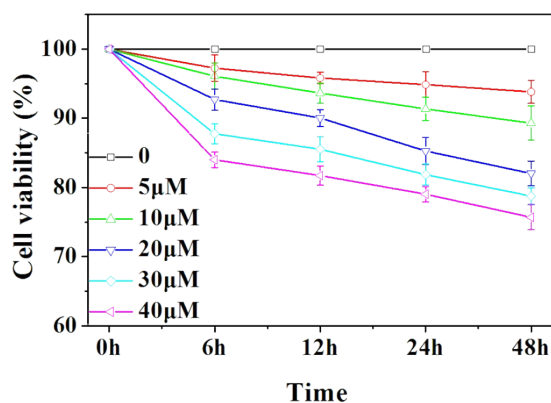

**Fig. S9** The viability of SH-SY5Y cells under different glucosamine concentration and treatment time. The mean  $\pm$  SD is shown.

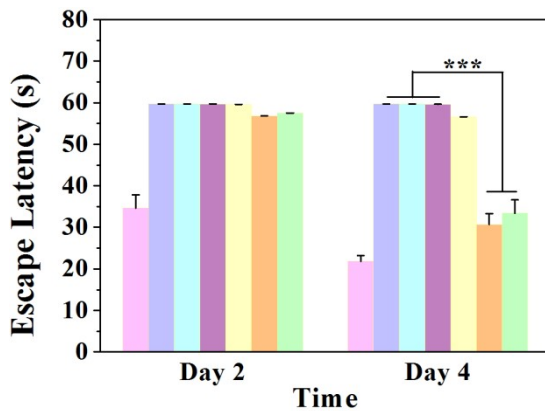

**Fig. S10** The escape latencies of mice. The mean  $\pm$  SD is shown. \*\*\* $p < 0.01$  versus control.

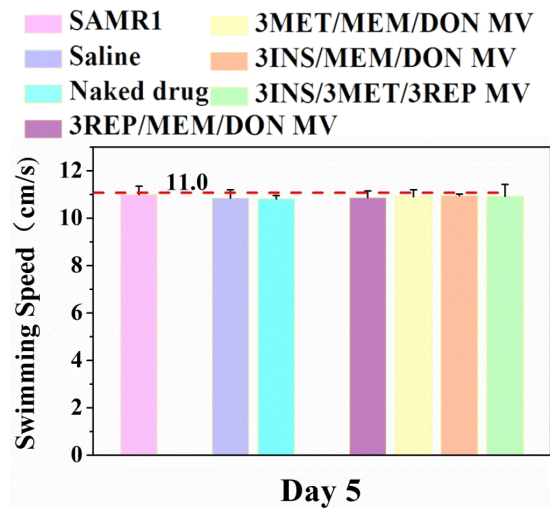

**Fig. S11** Swimming speed of mice. The mean  $\pm$  SD is shown.

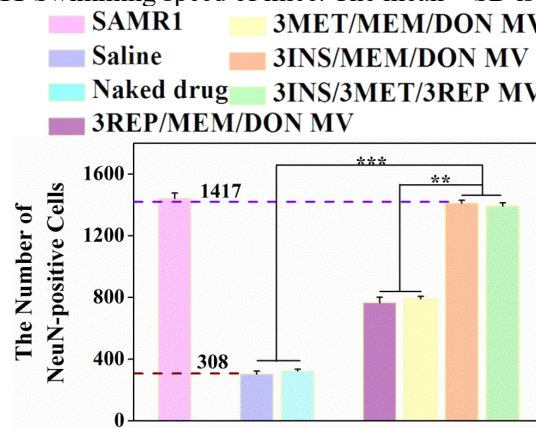

**Fig. S12** The number of Neun positive cells of mice. The mean  $\pm$  SD is shown. \*\* $p < 0.01$  and \*\*\* $p < 0.005$  versus control.

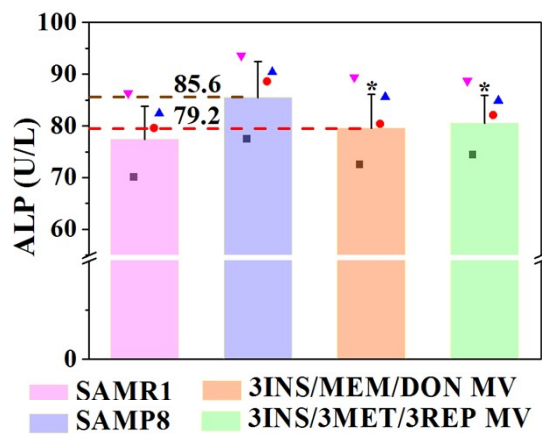

**Fig. S13** Serum alkaline phosphatase (ALP) level. The mean  $\pm$  SD is shown. \* $p < 0.05$  versus control.



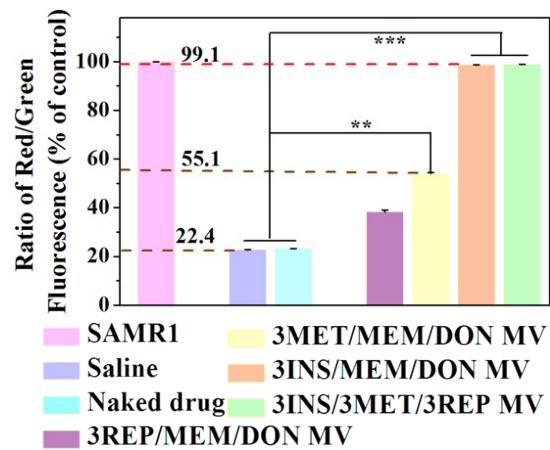

**Fig. S14** The mitochondrial membrane potential ( $\Delta\Psi_m$ ) of hippocampal neuron of mice. The mean  $\pm$  SD is shown. \* $p < 0.05$ , \*\* $p < 0.01$ , and \*\*\* $p < 0.005$  versus control.

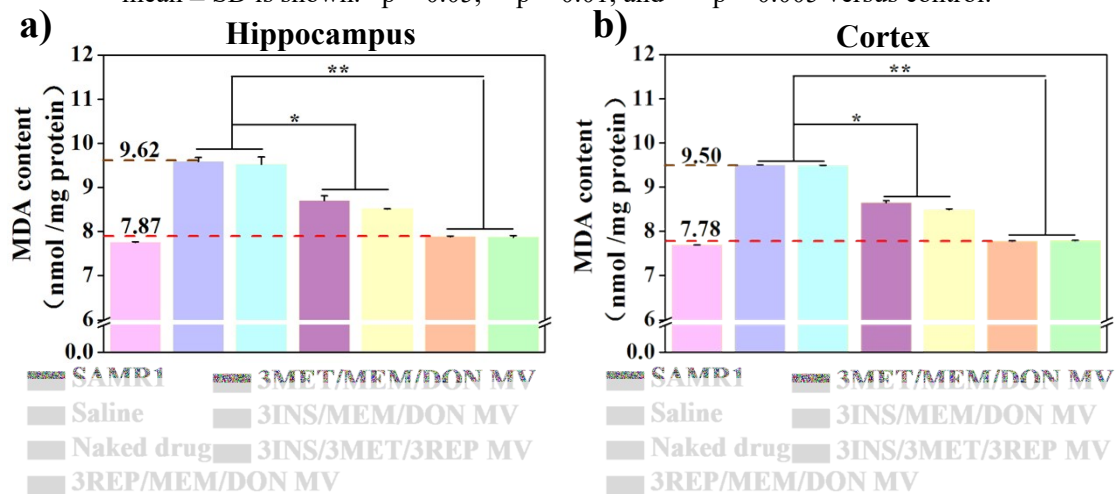

**Fig. S15** MDA content test of (a) hippocampus and (b) cortex. The mean  $\pm$  SD is shown. \* $p < 0.05$ , \*\* $p < 0.01$ , and \*\*\* $p < 0.005$  versus control.
